# Supplementary material for: Thicker Ice Improves the Integrity and Angular Distribution of CDC48A Hexamers on Cryo-EM Grids
Source: PubMed Central journal article supplement (PMC9247313; doi:10.3389/fmolb.2022.890390), 2022-06-17
Supplement: DataSheet1.pdf [file DataSheet1.pdf]

## *Supplementary Material*

### 1 Supplementary Tables

**Supplementary Table S1. Details of each Cryo-EM dataset.**

| <u>Sample Conditions</u>      | <b>Initial Dataset</b>      | <b>ACSMB</b>           | <b>eBIC</b>                       | <b>Optimized 1</b>          | <b>Optimized 2</b>          | <b>Optimized 3</b>     | <b>Optimized 4</b>     |
|-------------------------------|-----------------------------|------------------------|-----------------------------------|-----------------------------|-----------------------------|------------------------|------------------------|
| <b>Purification method</b>    | Standard                    | Standard               | Standard                          | Optimized                   | Optimized                   | Optimized              | Optimized              |
| <b>Storage conditions</b>     | Fresh                       | Frozen                 | Frozen                            | Fresh                       | Fresh                       | Fresh                  | Fresh                  |
| <b>Nucleotide added?</b>      | Yes                         | No                     | No                                | Yes                         | Yes                         | Yes                    | Yes                    |
| <b>SEC hexameric fraction</b> | Off-center                  | Pooled                 | Pooled                            | Center                      | Center                      | Center                 | Center                 |
| <u>Grid Conditions</u>        |                             |                        |                                   |                             |                             |                        |                        |
| <b>Grid Type</b>              | C-flat Cu 300 mesh R1.2/1.3 | Quantifoil Cu R1.2/1.3 | Self-wicking nanowire Cu R1.2/0.8 | C-flat Cu 300 mesh R1.2/1.3 | C-flat Cu 300 mesh R1.2/1.3 | C-flat Au 300 R1.2/1.3 | C-flat Au 300 R1.2/1.3 |
| <b>Glow discharged?</b>       | Yes                         | Yes                    | Yes                               | Yes                         | Yes                         | Yes                    | Yes                    |
| <b>Sample concentration</b>   | 2 mg/mL                     | 2 mg/mL                | 5 mg/mL                           | 2 mg/mL                     | 2 mg/mL                     | 2 mg/mL                | 2 mg/mL                |
| <b>Sample volume</b>          | 2 $\mu$ L                   | 3 $\mu$ L              | ~6 nL                             | 2 $\mu$ L                   | 2 $\mu$ L                   | 2 $\mu$ L              | 2 $\mu$ L              |
| <b>Equipment</b>              | Vitrobot Mark IV            | Vitrobot Mark IV       | Chameleon                         | Vitrobot Mark IV            | Vitrobot Mark IV            | Vitrobot Mark IV       | Vitrobot Mark IV       |

|                            |                                |                                   |                            |                                |                                |                                |                                |
|----------------------------|--------------------------------|-----------------------------------|----------------------------|--------------------------------|--------------------------------|--------------------------------|--------------------------------|
| <b>Blot time</b>           | 3 s                            | 3 s                               | -                          | 3 s                            | 3 s                            | 3 s                            | 3 s                            |
| <b>Temperature</b>         | Ambient                        | 4 °C                              | Ambient                    | Ambient                        | Ambient                        | Ambient                        | Ambient                        |
| <b>Humidity</b>            | 100%                           | 95%                               | 75% - 85%                  | 100%                           | 100%                           | 100%                           | 100%                           |
| <u>Data Collection</u>     |                                |                                   |                            |                                |                                |                                |                                |
| <b>Collection Facility</b> | KAUST I&C Core Lab             | University of Leeds, ACSMB        | Diamond Light Source, eBIC | KAUST I&C Core Lab             | KAUST I&C Core Lab             | KAUST I&C Core Lab             | KAUST I&C Core Lab             |
| <b>Microscope</b>          | Titan Krios G1                 | Titan Krios G2                    | Glacios                    | Titan Krios G1                 | Titan Krios G1                 | Titan Krios G1                 | Titan Krios G1                 |
| <b>Operating voltage</b>   | 300 kV                         | 300 kV                            | 200 kV                     | 300 kV                         | 300 kV                         | 300 kV                         | 300 kV                         |
| <b>Energy filter</b>       | GIF Quantum96 8 Imaging Filter | GIF BioQuantum 967 Imaging Filter | -                          | GIF Quantum96 8 Imaging Filter | GIF Quantum96 8 Imaging Filter | GIF Quantum96 8 Imaging Filter | GIF Quantum96 8 Imaging Filter |
| <b>Detector</b>            | K2 summit                      | K2 summit                         | Falcon IV                  | K2 summit                      | K2 summit                      | K2 summit                      | K2 summit                      |
| <b>Magnification</b>       | 130k                           | 130k                              | 120k                       | 130k                           | 130k                           | 130k                           | 130k                           |
| <b>Pixel size</b>          | 0.52 Å/pixel                   | 1.07 Å/pixel                      | 1.192 Å/pixel              | 0.52 Å/pixel                   | 0.52 Å/pixel                   | 0.52 Å/pixel                   | 0.52 Å/pixel                   |
| <b>Frames</b>              | 32                             | 60                                | 50                         | 32                             | 32                             | 32                             | 32                             |
| <b>Total dose</b>          | 50 e/Å <sup>2</sup>            | 75 e/Å <sup>2</sup>               | 48.1 e/Å <sup>2</sup>      | 50 e/Å <sup>2</sup>            | 50 e/Å <sup>2</sup>            | 50 e/Å <sup>2</sup>            | 50 e/Å <sup>2</sup>            |
| <b>Exposure time</b>       | 5.6 s                          | 10 s                              | 10 s                       | 5.6 s                          | 5.6 s                          | 5.6 s                          | 5.6 s                          |

Dataset  
Details

|                                     |      |      |      |      |      |      |      |
|-------------------------------------|------|------|------|------|------|------|------|
| <b>Movies</b>                       | 1242 | 1311 | 1472 | 1073 | 797  | 2118 | 2284 |
| <b>Particles picked</b>             | 177k | 100k | 500k | 91k  | 111k | 400k | 550k |
| <b>Particles in good 2D classes</b> | -    | 47k  | 250k | 71k  | 78k  | 270k | 430k |

## 2 Supplementary Figures

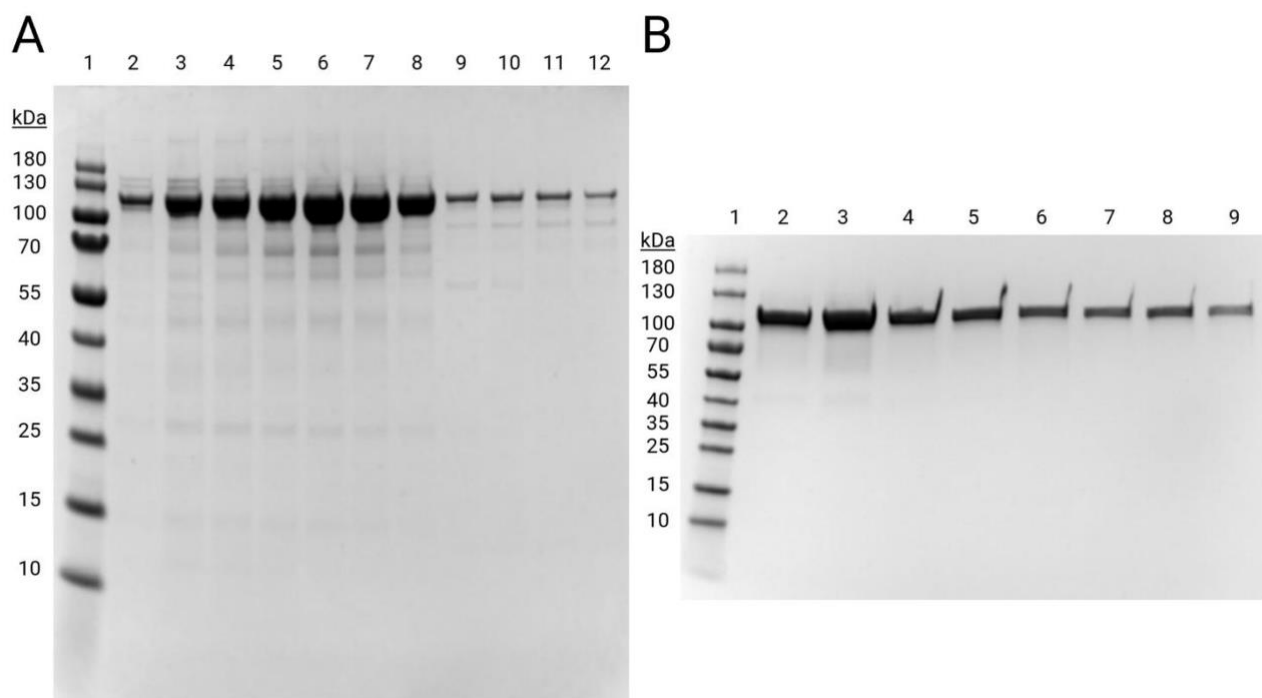

**Supplementary Figure S1. SDS-PAGE of the standard and optimized purification methods. (A)** SDS-PAGE gel corresponding to the SEC profile in Figure 1A. Lane 1 is the protein ladder, with molecular weights beside it. Lanes 2-4 correspond to peak 1. Lanes 5-9 correspond to peak 2. Lanes 9-12 correspond to peak 3. **(B)** SDS-PAGE gel corresponding to the SEC profile of the optimized method in Figure 3A. Lane 1 is the protein ladder, with molecular weights beside it. Lanes 2-9 correspond to fractions A10-B5, including fraction B3, respectively.
